# Supplementary material
Source: PubMed Central journal article supplement (PMC3024669)
Supplement: 1010082108_pnas.201010082SI.pdf [file 1010082108_pnas.201010082SI.pdf]

# Supporting Information

Hussein and Lim 10.1073/pnas.1010082108

## SI Materials and Methods

**Bacterial Strains and Plasmids.** As mentioned in the main text, the plasmids, strains, and oligonucleotide sequences are listed in Tables S1–S3 and the plasmid structures are shown in Fig. S1. The sRNAs, target mRNAs, and *hfq* gene were PCR-amplified from *E. coli* MG1655 genomic DNA. The target mRNA sequences for *ompC* (–81 to +36 bp) and *sodB* (–56 to +141 bp) that were fused to *gfp*, *mCherry*, or T7RNAP sequences were based on the constructs used by Urban and Vogel (1). For T7RNAP, only the first 300 bp was fused to *mCherry* in the RyhB-*sodB*::*gfp* competition studies and the first 900 bp was fused to the target mRNA sequences in the DsrA-*rhoS*::*gfp* competition studies. The *fhlA* target mRNA sequence (–309 to +96 bp) is the same as previously reported (2). We fused the *rhoS* target mRNA sequence between –150 and +30 bp to *gfp*. Nucleotide numbering is relative to the start codon.

The *gfp* gene and the T1T2 terminator sequence were obtained from pTAK102 (3). The *mCherry* gene was amplified from a plasmid provided by R. Tsien (University of California, San Diego, CA) (4). The T7RNAP gene was amplified from the strain BL21DE3 (Stratagene). The Asp terminator sequence was PCR-amplified from pLex (Invitrogen). The pLlacO-1 and pLtetO-1 promoters were obtained from pZE21 (5). Mutations in the –10 and –35 sites of pLtetO-1 were introduced by PCR to generate pLtetO-1m9. The pcon promoter, which was generated by PCR synthesis, is a constitutive promoter (5' *tcgagcaccgctggtgtgacatttttaAgcttggcggttataatggattccacaca* 3') modified from the sequences described by Lanzer and Bujard (6) (in some promoters, the capitalized A was replaced with T to abolish the *Hind*III site). The st7 and st3 RBS sequences were synthesized (7). Genes were deleted by the  $\lambda$ -Red method (8).

**Data Collection and Analysis.** Single-cell measurements of GFP expression were collected with a Beckman–Coulter EPICS XL-MCL, and the data were analyzed using Flow explorer 4.1 (R. Hoebe, University of Amsterdam, Amsterdam, The Netherlands) and custom programs written with Matlab software (MathWorks). All cultures were grown at 37 °C in LB with 100  $\mu$ g/mL ampicillin (Sigma). Bacterial cultures were generated by diluting overgrown cultures 1:10,000 in LB media, growing them for 3 h, and diluting them again (1:1,000) with the appropriate concentration of IPTG (Fisher Scientific) and were then grown for another 150 min. The dilutions were adjusted for slower growing cultures, such that the cell density at fluorescence measurement was approximately the same for all strains. Slower growing cultures include strains with *hfq* deleted, highly transcribed *hfq*, pcon-OxyS, or pLlacO-1-*sodB*::*gfp* when RyhB was absent.

**Western Blotting.** Four milliliters of exponentially growing cells ( $\approx 0.3$  OD<sub>600</sub>) was centrifuged, and the cell pellet was dissolved in 5% (wt/vol) SDS buffer. The samples were sonicated, heated at 70 °C for 10 min in LDS sample buffer (Invitrogen), and separated on 10% (wt/vol) Bis-Tris gel (Invitrogen) with MES buffer (50 mM MES, 50 mM Tris base, 0.1% SDS, and 1 mM EDTA)

at 200 V for 30 min. Equal amounts of protein were loaded onto the gel by normalizing the OD. The gels were blotted onto PVDF membranes (GE Healthcare Life Sciences) in transfer buffer (Invitrogen) at 15 V for 35 min in transfer buffer, blocked in 10% wt/vol dry milk and TTBS20 [50 mM Tris, 150 mM NaCl, and 0.1% (vol/vol) Tween 20], and then incubated overnight in 5% wt/vol dry milk at 4 °C with a 1:5,000 dilution of rabbit anti-Hfq (80 mg/mL; kindly provided by Udo Blasi and Branislav Vecerek, Max F. Perutz Laboratories, University of Vienna, Vienna) or a 1:5,000 dilution of goat anti-L9 antibody (143 mg/mL; kindly provided by Isabella Moll, Max F. Perutz Laboratories, University of Vienna, Vienna). The secondary antibodies were donkey anti-rabbit IgG HRP (GE Healthcare Life Sciences) and donkey anti-goat IgG-HRP (Santa Cruz Biotechnology) used at a 1:10,000 dilution. The secondary antibodies were visualized with ECL Plus Western Blotting Detection Reagents and radiographic film (both from GE Healthcare Life Sciences). Digital images were captured by transillumination of the film using the Gel Doc XR imaging system (Bio-Rad). Band intensity was quantified on nonsaturated exposures with an algorithm based on the area and intensity of the bands using Quantity One Analysis software (Bio-Rad). A spectra multicolor low-range ladder (Fermentas) was used to size the bands. Western blots were performed in triplicate.

**Quantitative RT-PCR.** The sRNA and target mRNA concentrations were measured by quantitative RT-PCR. The RNA measurements were made as follows. Total RNA was extracted from five exponentially growing cell cultures using TRIzol (Invitrogen) and then treated with DNase I (New England Biolabs). The cDNA was synthesized from the DNase I-treated RNA using the iScript select cDNA synthesis kit and random primers (Bio-Rad). Quantitative PCR was then performed to determine the concentration of cDNA using iQ SYBR Green Supermix (Bio-Rad) with the iQ5 Real-Time PCR detection system (Bio-Rad). An identical amount of DNase I-treated RNA was prepared exactly as for the cDNA sample except that water was added instead of reverse transcriptase (–RT). The –RT sample was amplified in exactly the same manner as the cDNA sample to determine the concentration of contaminating DNA. Differences in RNA extraction, loading, and the efficiency of cDNA synthesis were normalized by measuring the stable 5S ribosomal RNA (*rrfB*) in each sample. The sRNA and target mRNA (“sample”) and *rrfB* were amplified with the oligonucleotides shown in Table S3. The amount of mRNA was calculated by the following equation:

$$\frac{E_{\text{sample}}^{CT(cDNA)} - E_{\text{sample}}^{CT(-RT)}}{E_{\text{rrfB}}^{CT(cDNA)} - E_{\text{rrfB}}^{CT(-RT)}}$$

The cycle threshold (CT) values were determined automatically by the iQ5 software. The PCR efficiency was determined for every oligonucleotide pair ( $E_{\text{sample}}$ ) and the control pair ( $E_{\text{rrfB}}$ ) from five samples at five different dilutions. Measurements were performed in at least triplicate.

- Urban JH, Vogel J (2007) Translational control and target recognition by *Escherichia coli* small RNAs in vivo. *Nucleic Acids Res* 35:1018–1037.
- Argaman L, Altuvia S (2000) *fhlA* repression by OxyS RNA: Kissing complex formation at two sites results in a stable antisense-target RNA complex. *J Mol Biol* 300:1101–1112.
- Gardner TS, Cantor CR, Collins JJ (2000) Construction of a genetic toggle switch in *Escherichia coli*. *Nature* 403:339–342.

- Shaner NC, et al. (2004) Improved monomeric red, orange and yellow fluorescent proteins derived from *Discosoma* sp. red fluorescent protein. *Nat Biotechnol* 22:1567–1572.
- Lutz R, Bujard H (1997) Independent and tight regulation of transcriptional units in *Escherichia coli* via the LacR/O, the TetR/O and AraC11-12 regulatory elements. *Nucleic Acids Res* 25:1203–1210.
- Lanzer M, Bujard H (1988) Promoters largely determine the efficiency of repressor action. *Proc Natl Acad Sci USA* 85:8973–8977.

7. Vellanoth RL, Rabinowitz JC (1992) The influence of ribosome-binding-site elements on translational efficiency in *Bacillus subtilis* and *Escherichia coli* in vivo. *Mol Microbiol* 6:1105-1114.

8. Datsenko KA, Wanner BL (2000) One-step inactivation of chromosomal genes in *Escherichia coli* K-12 using PCR products. *Proc Natl Acad Sci USA* 97:6640-6645.

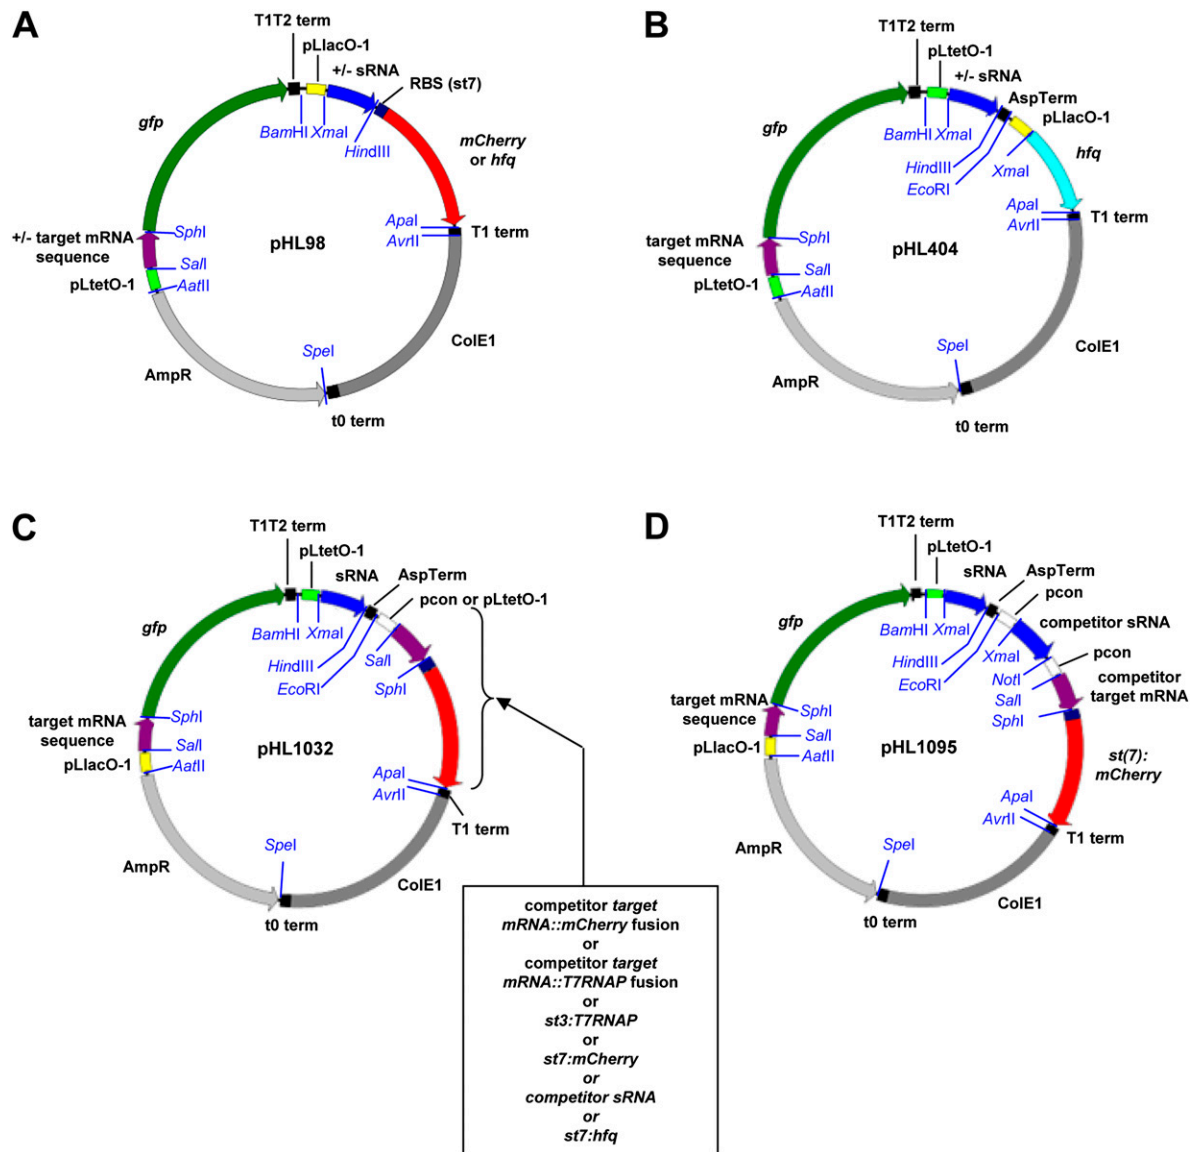

Fig. S1. Plasmid construction. The general construction of the plasmids used for the experiments is shown. (A) Plasmids shown in Figs. 1 A–C, 2E, and 3. (B) Plasmids shown in Figs. 1D and 2 B–D. (C) Plasmids shown in Fig. 4. (D) Plasmids shown in Fig. 5.



Table S1. Cont.

| Strain  | Description            |
|---------|------------------------|
| HL 3330 | HL 770 + pHL 1009      |
| HL 3331 | HL 770 + pHL 1011      |
| HL 3338 | HL 770 + $\Delta rhyB$ |
| HL 3339 | HL 770 + pHL 100       |
| HL 3347 | HL 3338 + pHL 720      |
| HL 3357 | HL 716 + pHL 1191      |
| HL 3358 | HL 770 + pHL 1191      |
| HL 3373 | HL 2752 + pHL 1011     |
| HL 3374 | HL 3338 + pHL 1011     |
| HL 3375 | HL 865 + pHL 1008      |
| HL 3376 | HL 1188 + pHL 1008     |
| HL 3395 | HL 862 + pHL 1009      |
| HL 3396 | HL 1128 + pHL 1009     |
| HL 3425 | HL 770 + $\Delta oxyS$ |
| HL 3447 | HL 3425 + pHL 1179     |
| HL 3448 | HL 3425 + pHL 1191     |
| HL 3449 | HL 3262 + pHL 1179     |
| HL 3450 | HL 3262 + pHL 1191     |
| HL 3545 | HL 770 + pHL 1213      |
| HL 3612 | HL 716 + pHL 841       |
| HL 3619 | HL 716 + pHL 1228      |
| HL 3722 | HL 716 + pHL 404       |
| HL 3723 | HL 716 + pHL 489       |
| HL 3724 | HL 716 + pHL 991       |
| HL 3857 | HL 716 + pHL 1303      |
| HL 3858 | HL 716 + pHL 1304      |
| HL 3859 | HL 716 + pHL 1305      |
| HL 3860 | HL 716 + pHL 802       |
| HL 3902 | HL 770 + pHL 404       |
| HL 3903 | HL 770 + pHL 489       |
| HL 3904 | HL 770 + pHL 991       |
| HL 4120 | HL 716 + pHL 1370      |
| HL 4168 | HL 716 + pHL 1394      |
| HL 4175 | HL 716 + pHL 1391      |
| HL 4178 | HL 862 + pHL 1360      |
| HL 4179 | HL 865 + pHL 1381      |
| HL 4180 | HL 2752+ pHL 1358      |
| HL 4202 | HL 716 + pHL 1389      |
| HL 4203 | HL 716 + pHL 1405      |
| HL 4209 | HL 716 + pHL 1410      |
| HL 4211 | HL 716 + pHL 1413      |
| HL 4212 | HL 716 + pHL 1414      |
| HL 4218 | HL 716 + pHL 1411      |
| HL 4219 | HL 716 + pHL 1416      |

**Table S2. Plasmids**

| Plasmid  | Description                                                                                                                                                                   |
|----------|-------------------------------------------------------------------------------------------------------------------------------------------------------------------------------|
| pHL 67   | <i>lacIq</i> from pTrc99a + ColE1 from pZE21 + KanR cassette from pKD13 (including the P1 and P4 oligonucleotide sites). Template for <i>lacIq</i> insertion into the genome. |
| pHL 98   | pLlacO-1:DsrA-mCherry, pLtetO-1: <i>rpoS::gfp</i>                                                                                                                             |
| pHL 100  | pLlacO-1:OxyS-mCherry, pLtetO-1: <i>fhIA::gfp</i>                                                                                                                             |
| pHL 108  | pLlacO-1:micC-mCherry, pLtetO-1: <i>ompC::gfp</i>                                                                                                                             |
| pHL 269  | pLtetO-1:micC-mCherry, pLlacO-1: <i>ompC::gfp</i>                                                                                                                             |
| pHL 282  | pLtetO-1:mCherry, pLlacO-1: <i>ompC::gfp</i>                                                                                                                                  |
| pHL 344  | pLtetO-1:mCherry, pLlacO-1: <i>rpoS::gfp</i>                                                                                                                                  |
| pHL 404  | pLtetO-1:micC, pLlacO-1: <i>hfq</i> , pLtetO-1: <i>ompC::gfp</i>                                                                                                              |
| pHL 489  | pLtetO-1:DsrA, pLlacO-1: <i>hfq</i> , pLtetO-1: <i>rpoS::gfp</i>                                                                                                              |
| pHL 720  | pLtetO-1:mCherry, pLlacO-1: <i>sodB::gfp</i>                                                                                                                                  |
| pHL 745  | pLtetO-1:RhyB-mCherry, pLlacO-1: <i>sodB::gfp</i>                                                                                                                             |
| pHL 762  | pLtetO-1:micC, pLtetO-1: <i>sodB::mCherry</i> , pLlacO-1: <i>ompC::gfp</i>                                                                                                    |
| pHL 765  | pLtetO-1:micC, pLtetO-1:DsrA, pLlacO-1: <i>ompC::gfp</i>                                                                                                                      |
| pHL 772  | pLtetO-1:RhyB, pLtetO-1: <i>hfq</i> , pLlacO-1: <i>sodB::gfp</i>                                                                                                              |
| pHL 777  | pLtetO-1:micC, pLtetO-1:RhyB, pLlacO-1: <i>ompC::gfp</i>                                                                                                                      |
| pHL 787  | pLtetO-1:micC, pLtetO-1: <i>rpoS::mCherry</i> , pLlacO-1: <i>ompC::gfp</i>                                                                                                    |
| pHL 802  | pLtetO-1:OxyS-mCherry, pLlacO-1: <i>ompC::gfp</i>                                                                                                                             |
| pHL 814  | pLtetO-1:micC, pLtetO-1:OxyS, pLlacO-1: <i>ompC::gfp</i>                                                                                                                      |
| pHL 818  | pLtetO-1:micC, pLtetO-1: <i>fhIA::mCherry</i> , pLlacO-1: <i>ompC::gfp</i>                                                                                                    |
| pHL 841  | pLtetO-1:RhyB-mCherry, pLlacO-1: <i>ompC::gfp</i>                                                                                                                             |
| pHL 908  | pLlacO-1:RhyB::mCherry, pLtetO-1m9: <i>sodB::gfp</i>                                                                                                                          |
| pHL 990  | pLtetO-1:DsrA, pcon:RhyB, pLlacO-1: <i>rpoS::gfp</i>                                                                                                                          |
| pHL 991  | pLtetO-1:RhyB, pLlacO-1: <i>hfq</i> , pLtetO-1m9: <i>sodB::gfp</i>                                                                                                            |
| pHL 1008 | pLlacO-1:DsrA-mCherry, pLtetO-1:RBS (st7) <i>gfp</i>                                                                                                                          |
| pHL 1009 | pLlacO-1:micC-mCherry, pLtetO-1:RBS (st7) <i>gfp</i>                                                                                                                          |
| pHL 1011 | pLlacO-1:RhyB-mCherry, pLtetO-1:RBS (st7) <i>gfp</i>                                                                                                                          |
| pHL 1019 | pLtetO-1:RhyB, pcon:micC, pLlacO-1: <i>sodB::gfp</i>                                                                                                                          |
| pHL 1020 | pLtetO-1:RhyB, pcon:DsrA, pLlacO-1: <i>sodB::gfp</i>                                                                                                                          |
| pHL 1022 | pLtetO-1:RhyB, pcon:OxyS, pLlacO-1: <i>sodB::gfp</i>                                                                                                                          |
| pHL 1032 | pLtetO-1:RhyB, pcon: <i>ompC::mCherry</i> , pLlacO-1: <i>sodB::gfp</i>                                                                                                        |
| pHL 1033 | pLtetO-1:RhyB, pcon: <i>rpoS::mCherry</i> , pLlacO-1: <i>sodB::gfp</i>                                                                                                        |
| pHL 1035 | pLtetO-1:RhyB, pcon: <i>fhIA::mCherry</i> , pLlacO-1: <i>sodB::gfp</i>                                                                                                        |
| pHL 1037 | pLtetO-1:DsrA, pcon:micC, pLlacO-1: <i>rpoS::gfp</i>                                                                                                                          |
| pHL 1039 | pLtetO-1:DsrA, pcon:OxyS, pLlacO-1: <i>rpoS::gfp</i>                                                                                                                          |
| pHL 1056 | pcon:micC, pLlacO-1: <i>rpoS::gfp</i>                                                                                                                                         |
| pHL 1057 | pcon:RhyB, pLlacO-1: <i>rpoS::gfp</i>                                                                                                                                         |
| pHL 1069 | pcon:micC, pLlacO-1: <i>sodB::gfp</i>                                                                                                                                         |
| pHL 1070 | pcon:DsrA, pLlacO-1: <i>sodB::gfp</i>                                                                                                                                         |
| pHL 1073 | pcon: <i>ompC::mCherry</i> , pLlacO-1: <i>sodB::gfp</i>                                                                                                                       |
| pHL 1074 | pcon: <i>rpoS::mCherry</i> , pLlacO-1: <i>sodB::gfp</i>                                                                                                                       |
| pHL 1075 | pcon: <i>fhIA::mCherry</i> , pLlacO-1: <i>sodB::gfp</i>                                                                                                                       |
| pHL 1095 | pLtetO-1:RhyB, pcon:micC, pcon: <i>ompC::mCherry</i> , pLlacO-1: <i>sodB::gfp</i>                                                                                             |
| pHL 1096 | pLtetO-1:RhyB, pcon:DsrA, pcon: <i>rpoS::mCherry</i> , pLlacO-1: <i>sodB::gfp</i>                                                                                             |
| pHL 1147 | pcon:OxyS, pLlacO-1: <i>rpoS::gfp</i>                                                                                                                                         |
| pHL 1148 | pcon:OxyS, pLlacO-1: <i>sodB::gfp</i>                                                                                                                                         |
| pHL 1158 | pLtetO-1:RhyB, pcon:DsrA, pcon: <i>ompC::mCherry</i> , pLlacO-1: <i>sodB::gfp</i>                                                                                             |
| pHL 1179 | pLtetO-1:mCherry, pLlacO-1: <i>fhIA::gfp</i>                                                                                                                                  |
| pHL 1191 | pLlacO-1:OxyS-mCherry, pLtetO-1:RBS (st7) <i>gfp</i>                                                                                                                          |
| pHL 1213 | pLlacO-1: <i>hfq</i> , pLtetO-1:RBS (st7) <i>gfp</i>                                                                                                                          |
| pHL 1228 | pLtetO-1:DsrA-mCherry, pLlacO-1: <i>ompC::gfp</i>                                                                                                                             |
| pHL 1303 | pLtetO-1: <i>sodB::mCherry</i> , pLlacO-1: <i>ompC::gfp</i>                                                                                                                   |
| pHL 1304 | pLtetO-1: <i>rpoS::mCherry</i> , pLlacO-1: <i>ompC::gfp</i>                                                                                                                   |
| pHL 1305 | pLtetO-1: <i>fhIA::mCherry</i> , pLlacO-1: <i>ompC::gfp</i>                                                                                                                   |
| pHL 1358 | pLlacO-1: <i>hfq</i> , pLtetO-1m9: <i>sodB::gfp</i>                                                                                                                           |
| pHL 1360 | pLlacO-1: <i>hfq</i> , pLtetO-1: <i>ompC::gfp</i>                                                                                                                             |
| pHL 1370 | pLtetO-1:DsrA, pcon:T7(st3) (900bps), pLlacO-1: <i>rpoS::gfp</i>                                                                                                              |
| pHL 1381 | pLlacO-1: <i>hfq</i> , pLtetO-1: <i>rpoS::gfp</i>                                                                                                                             |
| pHL 1389 | pLtetO-1:DsrA, pLlacO-1: <i>rpoS::gfp</i>                                                                                                                                     |
| pHL 1391 | pLlacO-1: <i>rpoS::gfp</i>                                                                                                                                                    |
| pHL 1394 | pLtetO-1:RhyB, pcon:T7(st3) (133bps)::mCherry, pLlacO-1: <i>sodB::gfp</i>                                                                                                     |

**Table S2. Cont.**

| Plasmid  | Description                                                                    |
|----------|--------------------------------------------------------------------------------|
| pHL 1405 | pLtetO-1:RhyB, pcon:DsrA, pLtetO-1: <i>hfq</i> , pLlacO-1: <i>sodB::gfp</i>    |
| pHL 1410 | pLtetO-1:DsrA, pcon: <i>ompC::T7noRBS(900bps)</i> , pLlacO-1: <i>rpoS::gfp</i> |
| pHL 1411 | pLtetO-1:DsrA, pcon: <i>fhlA::T7noRBS(900bps)</i> , pLlacO-1: <i>rpoS::gfp</i> |
| pHL 1413 | pcon: <i>ompC::T7noRBS(900bps)</i> , pLlacO-1: <i>rpoS::gfp</i>                |
| pHL 1414 | pcon: <i>fhlA::T7noRBS(900bps)</i> , pLlacO-1: <i>rpoS::gfp</i>                |
| pHL 1416 | pcon:T7 (st3) (900bps), pLlacO-1: <i>rpoS::gfp</i>                             |

**Table S3. Oligonucleotides**

| Name                    | Function                                                                                      | Sequence                                                                  |
|-------------------------|-----------------------------------------------------------------------------------------------|---------------------------------------------------------------------------|
| AatpLacSalF             | Fuses pLac directly to <i>gfp</i> , with <i>AatII</i> and <i>SalI</i> sites                   | ctagacgtcataaatgtgagcggataaacattgacattgtgagcggg<br>taacaagatactgt         |
| AspTermBamF             | Clones Asp terminator from pLex                                                               | ggcggatcctttaatcgtagacagggtagtacaaata                                     |
| AspTermHindIII          | Clones Asp terminator from pLex                                                               | ggccaagctttaatcgtagacagggtagtacaaata                                      |
| AspTermEcoRIR           | Clones Asp terminator from pLex                                                               | ccggaattcactgctcacaagaaaaaggcagc                                          |
| ColEApalF               | Adds <i>Apal</i> restriction site to ColE 1 origin                                            | gacgggcccattggtacgctgctagagg                                              |
| ColEBamHIF              | Amplifies ColE origin with terminators from pZE21                                             | cgcgatcccatggtacgctgctaga                                                 |
| ColeAatIIR              | Amplifies ColE origin with terminators from pZE21                                             | ctagacgtcgttcgagagctgcttgactct                                            |
| DsrA1XmalF              | PCR amplifies DsrA with native terminator                                                     | tcctccgggaacacatcagatttctgggttaa                                          |
| DsrA2ApaR               | PCR amplifies DsrA with native terminator                                                     | catgggccagcgtctctgaagtgaatcgttga                                          |
| DsrA3NoTermHindIII      | RT-PCR amplifies DsrA without native terminator                                               | ggccaagctcccaccctgagggggtcgggat                                           |
| DsrAKO1pkD1F            | Deletes chromosomal DsrA using pKD13 and the $\lambda$ -Red method                            | atatggcgaatatttctgtcagcgaaaaaattgcgataaggtgatg<br>gtgtaggctgagctgctc      |
| DsrAKO2pkD4R            | Deletes chromosomal DsrA using pKD13 and the $\lambda$ -Red method                            | tattcatgactcagcgtctgaagtgaatcgttgaatgcacaataa<br>aaattccggggatccctcgacc   |
| DsrA2HindIII            | PCR amplifies DsrA with native terminator                                                     | ggccaagcttagcgtctgaagtgaatcgttga                                          |
| DsrA2NotIR              | PCR amplifies DsrA with native terminator                                                     | tcctgcccgcagcgtctgaagtgaatcgttga                                          |
| FhlA1SalIF              | PCR amplifies <i>fhlA</i> sequence to fuse to <i>gfp</i>                                      | tactgtcagcgaattgctgggactggagccc                                           |
| FhlA3fusionSphIR        | PCR amplifies <i>fhlA</i> sequence to fuse to <i>gfp</i>                                      | tacgatgctctcacacagcagggccagatcggg                                         |
| GfpRBS5alF              | PCR amplifies <i>gfp</i> with <i>SalI</i> site and RBS (st7)                                  | cctgtcctaaggagaaaaaaatcgtaaaggagaagaactttc                                |
| GFPseqR                 | RT-PCR amplifies mRNA sequences fused to <i>gfp</i>                                           | gtatgttcacaccttccacctccactgacag                                           |
| HfqNoStopSphR           | PCR amplifies <i>hfq</i> sequence to fuse to <i>gfp</i>                                       | ttacgatgcttctggttcttcgctgctgctgtg                                         |
| HfqRBSXmalF             | PCR amplifies <i>hfq</i> with RBS (st7)                                                       | cctccgggtaaggagaaaaaaatggtaaggggcaatctttacaag                             |
| HfqPromAatF             | PCR amplifies <i>hfq</i> , native <i>hfq</i> promoter, and <i>hfq</i> leader region           | cgcgacgtcgtgacgaagtattacaggttgt                                           |
| HfqApaIR                | PCR amplifies <i>hfq</i> with RBS (st7)                                                       | gacgggcccttattcggttcttcgctgctcgt                                          |
| HfqHindR                | PCR amplifies <i>hfq</i> with RBS (st7)                                                       | ggccaagcttattcggttcttcgctgctcgt                                           |
| HfqpkD1F                | Deletes chromosomal <i>hfq</i> using pKD13 and the $\lambda$ -Red method                      | tcagaatcgaaaggttcaaagtacaaataagcatataaggaaaagagag<br>agtgtaggctggagctgctc |
| HfqpkD4R                | Deletes chromosomal <i>hfq</i> using pKD13 and the $\lambda$ -Red method                      | ggaacgcaggatcgctggctcccgtgtaaaaaacagcccgaacctta<br>attccgggatccgctgacc    |
| IntSpKD1F               | PCR amplifies <i>laclq</i> and the KanR cassette from pHL67 to insert at the <i>intS</i> site | ccgtagatttacagctcgtcatggttcgcttcagatcgttgacagccgag<br>tgtaggctggagctgctc  |
| LacIQIntS               | PCR amplifies <i>laclq</i> and KanR cassette from pHL67 to insert at <i>intS</i> site         | atagttgtaaggctcactccaccttctcatcaagccagtcgccc<br>agctaactcacattaattgctgtc  |
| mCherryRBSBsiWIHindIII  | PCR amplifies mCherry with RBS (st7)                                                          | tcttaaaagcttataaaggagaaacgtacagtggtgagcaagggc<br>gaggagg                  |
| mCherryCYFPRBSSphXmalF  | Clones mCherry in the absence of an sRNA with <i>XmaI</i> and <i>Apal</i> sites               | tacgatgccctcccgggtaaggaggaaaaaaattggtgagcaaggg<br>cgaggag                 |
| mCherryCYFPRBSSXmaSphIF | Clones mCherry fused to target mRNA with <i>SphI</i> and <i>Apal</i> sites                    | cctccgggtacgcatgctaaggaggaaaaaaattggtgagcaagg<br>gagaggag                 |
| mCherryApaIR            | PCR amplifies mCherry with RBS (st7)                                                          | catgggcccttactgtacagctgctcatgccc                                          |
| MicC1XmalF              | PCR amplifies MicC with native terminator                                                     | tcctccgggttatatgctttattgtcacaga                                           |
| MicC2ApaR               | PCR amplifies MicC with native terminator                                                     | taagggcccttgataaggattatccaattcta                                          |
| MicC2HindIII            | PCR amplifies MicC with native terminator                                                     | ggccaagctcttgataaggattatccaattcta                                         |
| MicC2NotIR              | PCR amplifies MicC with native terminator                                                     | tcctgcccgcctggataaggattatccaattcta                                        |
| MicC3NoTermHindIII      | RT-PCR amplifies MicC without native terminator                                               | ggccaagcttctgctgctgcttcttttatatgt                                         |
| MicCKO1pkD1F            | Deletes chromosomal MicC using pKD13 and the $\lambda$ -Red method                            | atacaaaaataaaataacttttaattgctatacgttattctgcccgggtgtag<br>ctggagctgctc     |
| MicCKO2pkD4R            | Deletes chromosomal MicC using pKD13 and the $\lambda$ -Red method                            | aaaaagcaacaccgattaaatgctctgataaggattatccaattctaaattccc<br>gggatccgctgacc  |
| OxySXmalF               | PCR amplifies OxyS with native terminator                                                     | tcctccgggaaaccgagcggcaccctctttaa                                          |
| OxySApaR                | PCR amplifies OxyS with native terminator                                                     | taagggcccttgagcctgcttattgcccgggc                                          |
| OxySHindIII             | PCR amplifies OxyS with native terminator                                                     | ggccaagcttggagcctgcttattgcccgggc                                          |
| OxySNotIR               | PCR amplifies OxyS with native terminator                                                     | tcctgcccgcctgagcctgcttattgcccgggc                                         |
| OxySNoTermHindIII       | RT-PCR amplifies OxyS without native terminator                                               | ggccaagcttggagcctgagatccgcaaaa                                            |
| OxyS1pkD1F              | Deletes chromosomal OxyS using pKD13 and the $\lambda$ -Red method                            | agcaatgaacgattatccctatcaagcattctgactgataattgctcacagtga<br>ggctggagctgctc  |
| OxyS2pkD4R              | Deletes chromosomal OxyS using pKD13 and the $\lambda$ -Red method                            | atttatgtataaattgagcctgcttattgcccgggctttttatggc<br>attccggggatccgctgacc    |
| partpTetOMicCXmaF       | First round PCR cloning of pLtetO-1 upstream of MicC                                          | gattgacatccctatcagtgatagatactcccgggttatatgctttat<br>tgtcacaga             |
| PconBamF                | PCR synthesis of pCon promoter                                                                | cgcgatcctcagcaccgctggttggacattttaagcttggcgggtataat                        |



Table S3. Cont.

| Name              | Function                                                                                            | Sequence                                                                               |
|-------------------|-----------------------------------------------------------------------------------------------------|----------------------------------------------------------------------------------------|
| PconEcoRF         | PCR synthesis of pCon promoter                                                                      | ccggaattctcgagcaccgctcgtgttgacatttttaagcttgccggtataat                                  |
| PconNoHindBamHF   | PCR synthesis of pCon promoter with no <i>HindIII</i> site                                          | cgcgatcctcgagcaccgctcgtgttgacattttatgcttgccggtataat                                    |
| PconNoHindEcoRF   | PCR synthesis of pCon promoter with no <i>HindIII</i> site                                          | ccggaattctcgagcaccgctcgtgttgacattttatgcttgccggtataat                                   |
| PconNoHindXmaR    | PCR synthesis of pCon promoter with no <i>HindIII</i> site                                          | cctccgggtgtgtggaatccattataaccgcaagcataaaaaatgcaacaac                                   |
| PconNoHindNotIHF  | PCR synthesis of pCon promoter with no <i>HindIII</i> site                                          | tcctgcggccgctcgagcaccgctcgtgttgacattttatgcttgccggtataat                                |
| PconXmaR          | PCR synthesis of pCon promoter                                                                      | cctccgggtgtgtggaatccattataaccgcaagcttaaaaaatgcaacaac                                   |
| pLacEcoRF         | PCR synthesis of pLacO-1 promoter with <i>EcoRI</i>                                                 | ccggaattcgatccataaatgtgagcggataacattgacattg                                            |
| pLacXmaBamHT1T2R  | PCR synthesis of pLacO-1 promoter with <i>BamHI</i> and <i>XmaI</i> sites                           | tcctccgggagatctgttatccgctcaaatgcaatgattccgctcacattta<br>tgatccccctaggctcaggccgcgattg   |
| pTetO-1SalIR      | PCR synthesis of pLtetO-1 promoter with <i>SalI</i>                                                 | tcctatcagtgatagagattgacatccctatcagtgatagagatactgtcgac                                  |
| pLtetO1m9SalR     | Mutates pLtetO-1 promoter by PCR                                                                    | caagtcgacagtctctatcactgatagggatgtcaatc                                                 |
| ptetOBamHIF       | PCR synthesis of pLtetO-1 promoter with <i>BamHI</i>                                                | cgcgatcctccctatcagtgatagagattgacatccctatcagtgatag                                      |
| pTetOXmaIR        | PCR synthesis of pLtetO-1 promoter with <i>XmaI</i>                                                 | cctccgggagatctctatcactgataggatgtcaatctctatcactg                                        |
| pOmpC1SalIF       | PCR amplifies <i>ompC</i> sequence to fuse to <i>gfp</i>                                            | tactgtcgacttccgactgattaatgaggggta                                                      |
| pOmpC2SphIR       | PCR amplifies <i>ompC</i> sequence to fuse to <i>gfp</i>                                            | tacgatgctagctgggaccaggaggacagtagc                                                      |
| PtsGgfpSphISalIF  | PCR amplifies <i>gfp</i> ( <i>ptsG</i> sequence in oligo removed with <i>SalI</i> and <i>SphI</i> ) | tactgtcgaccacgctgagaacgtaaaaaagcaccatactcaggagcactc<br>caagcatcgtaaaaggagaagaactttcact |
| RpoS-150SalIF     | PCR amplifies <i>rpoS</i> sequence to fuse to <i>gfp</i>                                            | tactgtcgaccacggaaccagttcaacacgcttgcatctt                                               |
| RpoS30SphIR       | PCR amplifies <i>rpoS</i> sequence to fuse to <i>gfp</i>                                            | tacgatgctatcatgaacttcagcgtattctg                                                       |
| rhyBXmaF          | PCR amplifies RyhB with native terminator                                                           | cctccggggcgatcaggaagaccctcgcggag                                                       |
| rhyBApaR          | PCR amplifies RyhB with native terminator                                                           | taagggcccgtggataaattgagaacgaaagat                                                      |
| rhyBHindR         | PCR amplifies RyhB with native terminator                                                           | ggcaagcttggataaattgagaacgaaagat                                                        |
| rhyBNotIR         | PCR amplifies RyhB with native terminator                                                           | tcctgcggccgctggataaattgagaacgaaagat                                                    |
| ryhBnotermR       | RT-PCR amplifies RyhB without native terminator                                                     | ctaagtaactggaagcaatgtg                                                                 |
| ryhBpkD1F         | Deletes chromosomal RyhB using pKD13 and the $\lambda$ -Red method                                  | taacgaacacaagcactcccgtggataaattgagaacgaaagatcaaaa<br>agtgtaggctggagctgctc              |
| ryhBpkD4R         | Deletes chromosomal RyhB using pKD13 and the $\lambda$ -Red method                                  | ttgcataaaagtgttgacaagtgcaatgagaatgattattattgtc<br>tcattccggggatccgtcgacc               |
| rrnB1361F         | RT-PCR amplifies the control, <i>rrfB</i> sequences                                                 | gaatgccacggtgaatcgtt                                                                   |
| rrnB1475R         | RT-PCR amplifies the control, <i>rrfB</i> sequences                                                 | cacaaagtggtaagcgcctt                                                                   |
| sodBSalF          | PCR amplifies <i>sodB</i> sequence to fuse to <i>gfp</i>                                            | caagtcgaccatacgacaataaggctattgtacg                                                     |
| sodBSphR          | PCR amplifies <i>sodB</i> sequence to fuse to <i>gfp</i>                                            | tacgatgctcgcggtaccttaacaggttgtt                                                        |
| 3T7RBS3XmaF       | PCR amplifies T7 RNA polymerase with an RBS (st3)                                                   | cctccgggtaggaggaaaatgaacacgattaacatcgctaagaa                                           |
| 3T7RBS3SalF       | PCR amplifies T7 RNA polymerase with an RBS (st3)                                                   | ttagtcgactaaggaggaaaatgaacacgattaacatcgctaagaa                                         |
| T7SphIF           | PCR amplifies T7 RNA polymerase with no RBS                                                         | acatgatgcacacgattaacatcgtaagaac                                                        |
| T7Stop900ApaR     | PCR amplifies T7 RNA polymerase and adds a stop codon at 900 bp                                     | cataggcccttaagtagcaccagcgcagaggacg                                                     |
| T7RNAP133stopSphR | PCR amplifies T7 RNA polymerase and adds a stop codon at 133 bp                                     | tacgatgccttagtaagactcatgtcctcaagggcaaa                                                 |
